# Supplementary material for: Overlapping effector interfaces define the multiple functions of the HIV-1 Nef polyproline helix
Source: PubMed Central journal article supplement (PMC3464899; doi:10.1186/1742-4690-9-47), 2012-05-31
Supplement: 1742-4690-9-47-S1.pdf [file 1742-4690-9-47-S1.pdf]

**Figure S1**

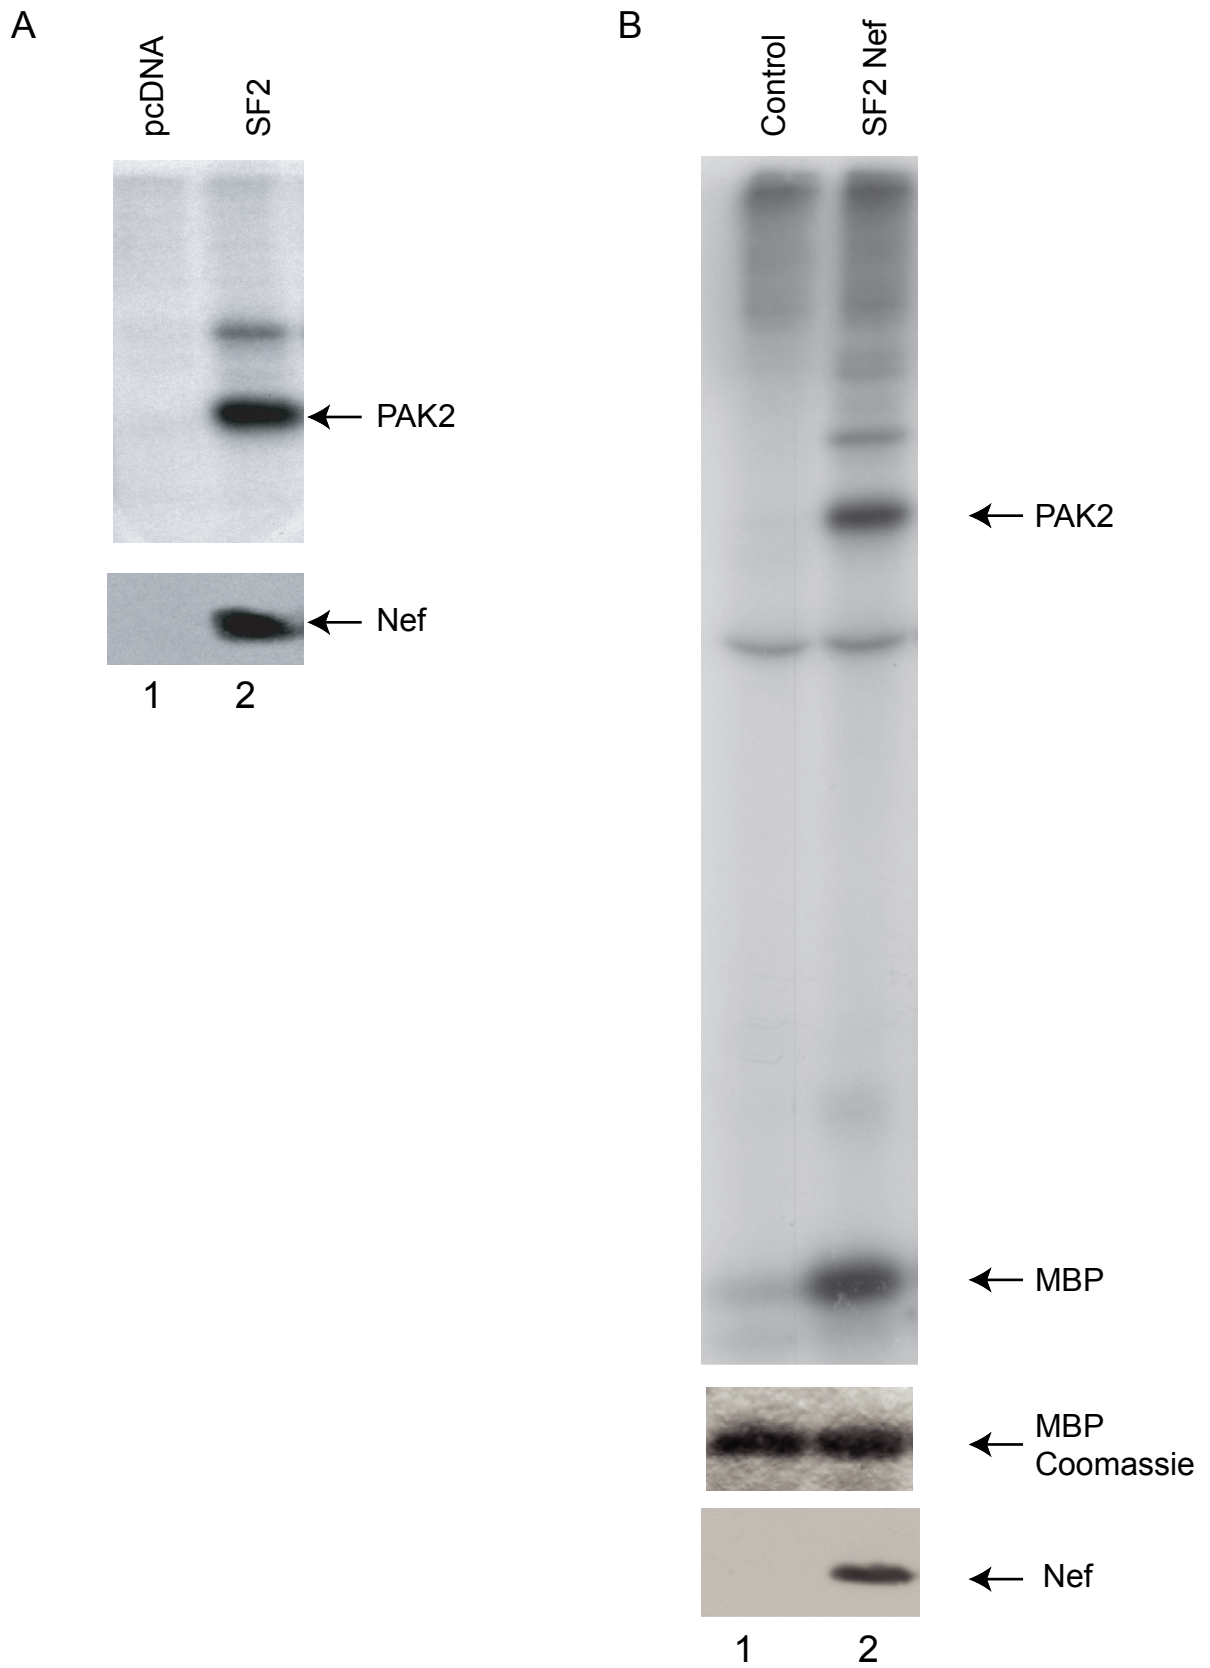

**Figure S1. SF2 induces the activation of PAK2 autophosphorylation and transkinase phosphorylation.**
